# Supplementary material
Source: publisher figshare collection journal article supplement (https://acs.figshare.com/ndownloader/files/4427542)
Supplement: Supplementary file 1 [file 4427542]

## Supporting Information:

Figure S-1.

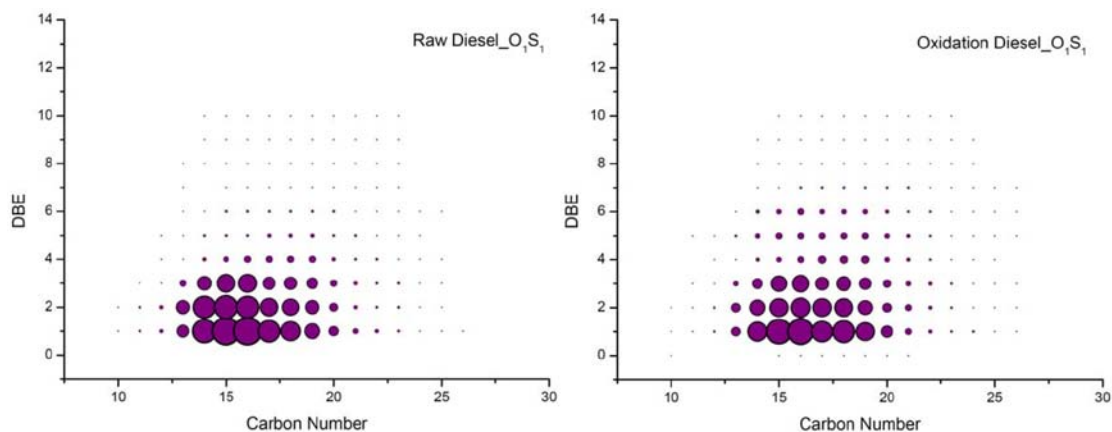

Figure S-1. Plots of double bond equivalents (DBE) as a function of carbon number for the O<sub>1</sub>S<sub>1</sub> class derived from the positive-ion ESI FT-ICR mass spectrum of the raw and oxidized diesel samples (Figure 3).

Note: The largest dot correspond to the most abundant O<sub>1</sub>S<sub>1</sub> species in the sample. Even if the relative abundance of a given species is the same for two samples, its not always means the two samples have the same absolute abundance on the species.
